# Supplementary material
Source: PubMed Central journal article supplement (PMC3147129)
Supplement: 274975.f1.pdf [file 274975.f1.pdf]

**Supplementary Table 1. EST libraries used in this study.** ESTs were downloaded from NCBI's dbEST on October 2009. Testis and ovary counts from each species are indicated in grey-scale. All other libraries are classified as non-reproductive in this study.

| <b>Species</b>             | <b>Tissue Library</b>   | <b>No. of ESTs</b> |
|----------------------------|-------------------------|--------------------|
| <i>Anolis carolinensis</i> | Brain                   | 1597               |
| <i>Anolis carolinensis</i> | Dewlap                  | 2316               |
| <i>Anolis carolinensis</i> | Ovary                   | 3599               |
| <i>Anolis carolinensis</i> | Regenerating tail       | 2504               |
| <i>Anolis carolinensis</i> | Testis                  | 2091               |
| <i>Danio rerio</i>         | Bone                    | 602                |
| <i>Danio rerio</i>         | Brain                   | 12069              |
| <i>Danio rerio</i>         | Eye                     | 5149               |
| <i>Danio rerio</i>         | Eye and brain           | 1014               |
| <i>Danio rerio</i>         | Fin                     | 3964               |
| <i>Danio rerio</i>         | Gill                    | 1458               |
| <i>Danio rerio</i>         | Gut                     | 2424               |
| <i>Danio rerio</i>         | Gut and internal organs | 7366               |
| <i>Danio rerio</i>         | Heart                   | 3646               |
| <i>Danio rerio</i>         | Kidney                  | 8461               |
| <i>Danio rerio</i>         | Liver                   | 3314               |
| <i>Danio rerio</i>         | Olfactory               | 4218               |
| <i>Danio rerio</i>         | Ovary                   | 18743              |
| <i>Danio rerio</i>         | Testis                  | 11229              |
| <i>Gallus gallus</i>       | Abdominal fat pad       | 412                |
| <i>Gallus gallus</i>       | Brain                   | 9203               |
| <i>Gallus gallus</i>       | Chondrocytes            | 5134               |
| <i>Gallus gallus</i>       | Heart                   | 1898               |
| <i>Gallus gallus</i>       | Kidney and adrenal      | 3881               |
| <i>Gallus gallus</i>       | Liver                   | 3412               |
| <i>Gallus gallus</i>       | Muscle                  | 1674               |
| <i>Gallus gallus</i>       | Ovary                   | 4424               |
| <i>Gallus gallus</i>       | Pancreas                | 1006               |
| <i>Gallus gallus</i>       | Small Intestine         | 3490               |
| <i>Gallus gallus</i>       | Testis                  | 1985               |
| <i>Mus musculus</i>        | Bone                    | 530                |
| <i>Mus musculus</i>        | Brain and spinal cord   | 24799              |
| <i>Mus musculus</i>        | Diaphragm               | 756                |
| <i>Mus musculus</i>        | Eye                     | 5113               |
| <i>Mus musculus</i>        | Heart and aorta vein    | 1186               |
| <i>Mus musculus</i>        | Inner ear               | 3185               |
| <i>Mus musculus</i>        | Kidney                  | 7975               |

|                           |                      |       |
|---------------------------|----------------------|-------|
| <i>Mus musculus</i>       | Liver                | 4178  |
| <i>Mus musculus</i>       | Lung                 | 1458  |
| <i>Mus musculus</i>       | Mid and hind gut     | 2048  |
| <i>Mus musculus</i>       | Olfactory turbinates | 39    |
| <i>Mus musculus</i>       | Ovary                | 531   |
| <i>Mus musculus</i>       | Pancreas             | 3868  |
| <i>Mus musculus</i>       | Pituitary            | 479   |
| <i>Mus musculus</i>       | Stomach              | 936   |
| <i>Mus musculus</i>       | Testis               | 5725  |
| <i>Mus musculus</i>       | Thymus               | 979   |
| <i>Mus musculus</i>       | Tongue               | 2002  |
| <i>Xenopus tropicalis</i> | Bone                 | 1230  |
| <i>Xenopus tropicalis</i> | Brain                | 8274  |
| <i>Xenopus tropicalis</i> | Eye                  | 2342  |
| <i>Xenopus tropicalis</i> | Fat body             | 1533  |
| <i>Xenopus tropicalis</i> | Heart                | 2786  |
| <i>Xenopus tropicalis</i> | Intestine            | 1965  |
| <i>Xenopus tropicalis</i> | Kidney               | 1140  |
| <i>Xenopus tropicalis</i> | Liver                | 2975  |
| <i>Xenopus tropicalis</i> | Lung                 | 3683  |
| <i>Xenopus tropicalis</i> | Ovary                | 5677  |
| <i>Xenopus tropicalis</i> | Pancreas             | 104   |
| <i>Xenopus tropicalis</i> | Skeletal muscle      | 2530  |
| <i>Xenopus tropicalis</i> | Skin                 | 2393  |
| <i>Xenopus tropicalis</i> | Small intestine      | 3125  |
| <i>Xenopus tropicalis</i> | Spleen               | 3564  |
| <i>Xenopus tropicalis</i> | Stomach              | 1483  |
| <i>Xenopus tropicalis</i> | Testis               | 16854 |
| <i>Xenopus tropicalis</i> | Thymus               | 1724  |

---

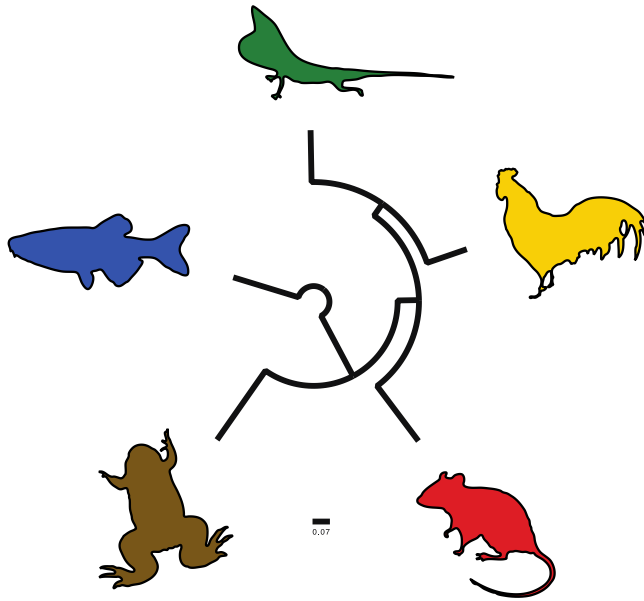

**Supplementary Figure 1. Five-species vertebrate phylogeny.** Unrooted maximum likelihood species tree based on concatenated CDS sequences from orthologs. Each internal node has 100% bootstrap support using 1000 replicates (Stamatakis 2006, Ott *et al.* 2007). A congruent maximum likelihood tree that uses concatenated protein sequences from all 4,986 orthologs also has 100% bootstrap support (not shown). Branch lengths are scaled in terms of expected number of substitutions (Felsenstein 2005).

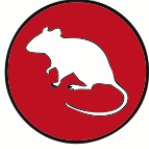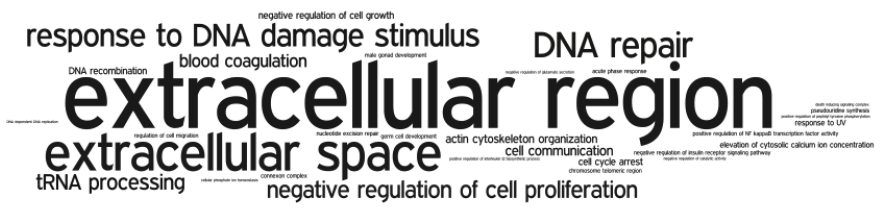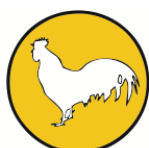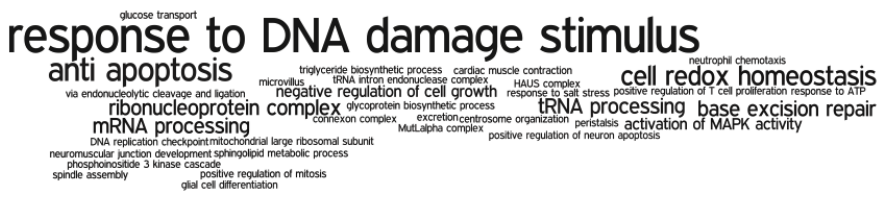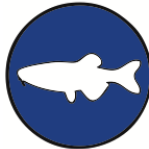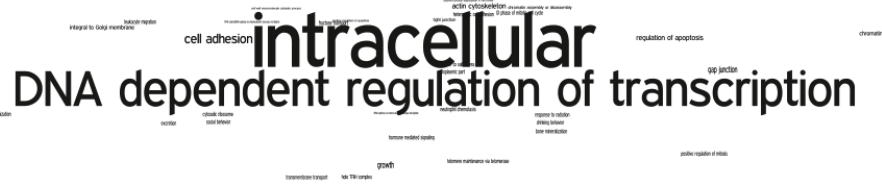

**Supplementary Figure 2. Word-size frequency distribution of Gene Ontology (GO) terms for the most diverged orthologs in *M. musculus*, *G. gallus*, and *D. rerio*.** Associated GO terms for the top 10% diverged ortholog subset are displayed according to size, based on the frequency of that term. GO terms from Biological Process (BP) and Cellular Component (CC) were used. The word-size frequency for *A. carolinensis* (with the largest GO term repertoire out of the five species) is shown in Figure 4, in the manuscript. *X. tropicalis* was omitted from the analysis due to low GO term coverage.
